# Supplementary material
Source: PubMed Central journal article supplement (PMC8302495)
Supplement: 40520_2021_1793_MOESM1_ESM.pdf [file 40520_2021_1793_MOESM1_ESM.pdf]

# The role of health determinants in the influenza vaccination uptake among older adults (65+): a scope review

Aging Clinical and Experimental Research

Regina Roller-Wirnsberger (Corresponding Author, Medical University of Graz, Department of Internal Medicine), Sonja Lindner, Lea Kolosovski, Elisabeth Platzer, Peter Dovjak, Holger Flick, Chariklia Tziraki and Maddalena Illario

**Supplementary Table 1: Study Characteristics**

| No. | Author (Year)           | Continent/ Country | Study design and method                                                                                                 | Participants and setting                                                               | ≥65 years subgroup % (sample) | Outcome (Effect estimate) |
|-----|-------------------------|--------------------|-------------------------------------------------------------------------------------------------------------------------|----------------------------------------------------------------------------------------|-------------------------------|---------------------------|
| 1   | Byeon (2018)            | Asia/ South Korea  | secondary analysis of a cross-sectional study<br>data retrieved from Korea community health survey (KCHS) questionnaire | Survey participants ≥ 50<br>n= 130.610                                                 | 49%<br>n= 64.134              | vaccine uptake (OR)       |
| 2   | Cha (2016)              | Asia/ South Korea  | cross-sectional study<br>data retrieved from KNHANES Survey                                                             | Adults ≥40 years old who underwent pulmonary function testing<br>n=3.224               | 31%<br>n=1.013                | vaccine uptake (OR)       |
| 3   | Chang (2016)            | Asia/ Taiwan       | cross-sectional study<br>data retrieved from National Disability Registration System & Health Service Records           | Disabled people aged ≥65 years<br>n= 283.172                                           | 100%                          | vaccine uptake (OR)       |
| 4   | Kwon (2016)             | Asia/ South Korea  | secondary analysis of a cross-sectional study<br>data retrieved from KNHANES IV survey questionnaire                    | Older adults aged ≥65 years<br>n=3.567                                                 | 100%                          | vaccine uptake (OR)       |
| 5   | Leung (2017)            | Asia/ Hong Kong    | randomized controlled trial                                                                                             | Patients (≥65 years old) of two general outpatient clinics<br>n=529                    | 100%                          | vaccine uptake (RR)       |
| 6   | Mo (2015)               | Asia/ Hong Kong    | cross-sectional study<br>telephone interview                                                                            | Older adults aged ≥65 years<br>n=1.101                                                 | 100%                          | vaccine uptake (OR)       |
| 7   | Oh (2015)               | Asia/ South Korea  | cross-sectional study<br>questionnaire                                                                                  | Adult cancer survivors aged ≥19 years old<br>n=35.127                                  | 23%<br>n=8.172                | vaccine uptake (OR)       |
| 8   | Wershof-Schwartz (2013) | Asia/ Israel       | cross-sectional study<br>data retrieved from the Maccabi Healthcare Services (MHS)                                      | patients aged ≥65 years which are members of MHS<br>n= 136.944<br>mean age: 74.6 years | 100%                          | vaccine uptake (OR)       |

|    |                       |                     |                                                                                                                                                             |                                                                                                    |                                                  |                             |
|----|-----------------------|---------------------|-------------------------------------------------------------------------------------------------------------------------------------------------------------|----------------------------------------------------------------------------------------------------|--------------------------------------------------|-----------------------------|
| 9  | Yu (2014)             | Asia/China          | cross-sectional study<br>face-to-face interviews                                                                                                            | community-dwelling older adults ≥65 years<br>n= 306                                                | 100%                                             | vaccine uptake (OR)         |
| 10 | Dyda (2015)           | Australia/Australia | secondary analysis of a cross-sectional study questionnaire                                                                                                 | participants of the cohort study "45 and Up Study" aged ≥ 45<br>n= 27.036<br>mean age = 65.6 years | 28.8%<br>n= 7.785                                | vaccine uptake (RR)         |
| 11 | Regan (2017)          | Australia/Australia | randomized controlled trial                                                                                                                                 | high-risk groups<br>n=12.354                                                                       | 29%<br>n=3.613                                   | vaccine uptake (RR)         |
| 12 | Aguilar (2012)        | Europe/Spain        | cross-sectional study<br>data retrieved from vaccination register                                                                                           | Non-institutionalized persons ≥ 65<br>n= 104.427                                                   | 100%                                             | vaccine uptake (OR)         |
| 13 | Barbadoro (2016)      | Europe/Italy        | secondary analysis of a cross-sectional study<br>data retrieved from "Health and healthcare use in Italy" Survey<br>questionnaire<br>face-to-face interview | Obese adults in Italy, ≥18 years old<br>n=10.530 (2005)<br>n=11.425 (2013)                         | 63 %<br>n=2.086 (2005)<br>53 %<br>n=2.221 (2013) | vaccine uptake (OR)         |
| 14 | Caille-Brillet (2014) | Europe/France       | secondary analysis of a cross-sectional study<br>data retrieved from the CoPanFlu France cohort questionnaire                                               | Participants ≥ 15 years old of the CoPanFlu France cohort<br>n= 1.174                              | 22.9%<br>n= 269                                  | vaccine uptake (OR)         |
| 15 | Domínguez (2016)      | Europe/Spain        | cross-sectional study<br>hospital medical records and questionnaire                                                                                         | patients aged ≥65 years<br>hospitalized due to causes unrelated to influenza<br>n=1.038            | 100%                                             | vaccine uptake (OR)         |
| 16 | Ganczak (2017)        | Europe/Poland       | cross-sectional study<br>questionnaire                                                                                                                      | Hospitalized patient ≥65 years old<br>n=230                                                        | 100%                                             | vaccine uptake (OR)         |
| 17 | Giese (2016)          | Europe/Ireland      | cross-sectional study<br>telephone interview                                                                                                                | adults at-risk and health care workers ≥18 years old<br>n=1.770                                    | 16%<br>n=285                                     | vaccine uptake (PR)         |
| 18 | Godoy (2015)          | Europe/Spain        | cross-sectional study<br>regional records and survey                                                                                                        | Physician providing patient care for adults ≥65 years<br>n=2.535                                   | 100%                                             | vaccine uptake (Prevalence) |

|    |                     |                            |                                                                                                                         |                                                                                                                                  |                            |                                                         |
|----|---------------------|----------------------------|-------------------------------------------------------------------------------------------------------------------------|----------------------------------------------------------------------------------------------------------------------------------|----------------------------|---------------------------------------------------------|
| 19 | Hellfritzsch (2017) | Europe/<br>Denmark         | cross-sectional study questionnaire                                                                                     | Older adults (65–79 years) in a tax-supported healthcare system<br><i>n</i> =4.237                                               | 100%                       | vaccine uptake (PR)                                     |
| 20 | Martínez-Baz (2012) | Europe/<br>Spain           | cross-sectional study data retrieved from vaccination registry                                                          | non-institutionalized persons aged ≥65 years registered and who received seasonal vaccine in 2009/10 season<br><i>n</i> = 64.245 | 100%                       | vaccine uptake (OR)                                     |
| 21 | Poscia (2016)       | Europe/<br>Italy           | Review                                                                                                                  | frail elderly people (aged ≥65 years)                                                                                            | 100%                       | n.a.                                                    |
| 22 | Shah (2012)         | Europe/<br>England & Wales | cross-sectional study data retrieved from primary care database                                                         | continually registered patients aged 65–104 from 312 practices in England & Wales<br><i>n</i> = 387.568<br>mean age: 85.5 years  | 100%                       | vaccine uptake (RR)                                     |
| 23 | Spreckelsen (2018)  | Europe/<br>Germany         | secondary analysis of a cross-sectional study data retrieved from claims data of GAK Gesundheit (health insurance fund) | nursing home residents aged ≥65 years<br><i>n</i> =42.068                                                                        | 100%                       | vaccine uptake (OR)                                     |
| 24 | Verger (2015)       | Europe/<br>France          | cohort study data retrieved from NHIF database                                                                          | patients aged ≥ 18 years treated with OHA for type 2 diabetes<br><i>n</i> = 110.823                                              | 55.4%<br><i>n</i> = 61.396 | vaccine uptake (RR)                                     |
| 25 | Vukovic (2018)      | Europe/<br>Italy           | cohort study data retrieved from Lazio Health and Social Policy Directorate and National Institute for Statistics       | elderly subjects aged ≥65 years living in the city of Rome from 2009–2013<br><i>n</i> = 554.028–590.603                          | 100%                       | vaccine uptake (variance)                               |
| 26 | Blank (2012)        | 15 European Countries      | cross-sectional study questionnaire                                                                                     | European National Vaccine Industry Groups (NVIGs) ( <i>n</i> =16) → relation to vaccine coverage rate among people ≥ 65          | 100%                       | vaccine uptake (correlation coefficient Spearman's Rho) |
| 27 | Banach (2012)       | North America/<br>USA      | cross-sectional study data retrieved from MSVD electronic medical record                                                | Patients ≥ 65 receiving routine care from MSVD<br><i>n</i> = 689<br>Median age: 86 years                                         | 100%                       | vaccine uptake (OR)                                     |

|    |                  |                       |                                                                                                                                 |                                                                                                                       |                                                                              |                     |
|----|------------------|-----------------------|---------------------------------------------------------------------------------------------------------------------------------|-----------------------------------------------------------------------------------------------------------------------|------------------------------------------------------------------------------|---------------------|
| 28 | Black (2017)     | North America/ USA    | secondary analysis of a cross-sectional study<br>data retrieved from Minimum Data Set (MDS)                                     | U.S. nursing home residents, ≥18 years old<br><i>n</i> =2,446,647 (2005-06)<br><i>n</i> =2,640,219 (2014-15)          | 86%<br><i>n</i> =2,113,398 (2005-06)<br>84%<br><i>n</i> =2,215,275 (2014-15) | vaccine uptake (OR) |
| 29 | Farmanara (2018) | North America/ Canada | secondary analysis of a cross-sectional study<br>data retrieved from Influenza Immunization Coverage Survey telephone interview | Canadian adults ≥18 years old<br><i>n</i> =1,950                                                                      | 26%<br><i>n</i> =514                                                         | vaccine uptake (OR) |
| 30 | Hurley (2018)    | North America/ USA    | randomized controlled trial<br>data retrieved from CIIS                                                                         | Adults (19-64 years old) with and without a high-risk condition and adults aged ≥65 years<br><i>n</i> =47,268         | 11%<br><i>n</i> =5,332                                                       | vaccine uptake (OR) |
| 31 | Kaljee (2017)    | North America/ USA    | qualitative cross-sectional study<br>focus group discussions                                                                    | patients at one of three targeted primary care clinics ≥ 65 years<br><i>n</i> = 48                                    | 100%                                                                         | vaccine uptake      |
| 32 | Khan (2018)      | North America/ USA    | cross-sectional study<br>data retrieved from BRFSS telephone interview                                                          | Older adults aged ≥65 years<br><i>n</i> =13,106,163                                                                   | 100%                                                                         | vaccine uptake (OR) |
| 33 | Lu (2014)        | North America/ USA    | secondary analysis of a cross-sectional study<br>data retrieved from BRFSS survey telephone interview                           | Non-institutionalized U.S. population aged ≥18 years<br><i>n</i> = 132,743                                            | 44.3%<br><i>n</i> = 58,814                                                   | vaccine uptake (PR) |
| 34 | Lu (2018)        | North America/ USA    | secondary analysis of a cross-sectional study<br>data retrieved from National Internet Flu Survey telephone interview           | Non-institutionalized U.S. population aged ≥18 years<br><i>n</i> =4,305                                               | 20%<br><i>n</i> =1,433                                                       | vaccine uptake (PR) |
| 35 | McIntyre (2014)  | North America/ Canada | qualitative cross-sectional study<br>focus group discussions                                                                    | older adults (aged 67-91) residing in retirement homes or condominium building<br><i>n</i> = 37<br>mean age: 82 years | 100%                                                                         | vaccine receipt     |

|    |                  |                       |                                                                                                                                    |                                                                                       |                     |                         |
|----|------------------|-----------------------|------------------------------------------------------------------------------------------------------------------------------------|---------------------------------------------------------------------------------------|---------------------|-------------------------|
| 36 | Pereira (2019)   | North America/ Canada | cross-sectional study survey                                                                                                       | adults aged $\geq 65$ years<br>n= 5.014<br>mean age: 71.3 years                       | 100%                | vaccine uptake (OR)     |
| 37 | Takayama (2012)  | North America/ USA    | secondary analysis of a cross-sectional study<br>data retrieved from BRFSS telephone interview                                     | Non-institutionalized U.S. population aged $\geq 18$ years<br>n= 420.968              | 31.9%<br>n= 134.101 | vaccine uptake (PR)     |
| 38 | Wooten (2012)    | North America/ USA    | secondary analysis of a cross-sectional study<br>data retrieved from National Adult Immunization Survey (NAIS) telephone interview | adults aged $\geq 65$ years<br>n= 3.821                                               | 100%                | vaccine uptake (OR)     |
| 39 | Yokum (2018)     | North America/ USA    | randomized controlled trial                                                                                                        | Medicare FFS beneficiaries $\geq 66$ years<br>n= 228.000                              | 100%                | vaccine uptake (HR)     |
| 40 | Francisco (2015) | South America/ Brazil | secondary analysis of a cross-sectional study<br>data retrieved from FIBRA survey questionnaire                                    | Older adults $\geq 65$ years old<br>n=679                                             | 100%                | vaccine uptake (PR)     |
| 41 | Sato (2015)      | South America/ Brazil | cross-sectional study questionnaire                                                                                                | community-dwelling older adults aged $\geq 60$ years<br>n=1,341                       | 71%<br>n=954        | vaccine uptake (PR)     |
| 42 | Doherty (2016)   | n.a.                  | Review                                                                                                                             | Risk groups                                                                           | n.a.                | n.a.                    |
| 43 | Kan (2018)       | n.a.                  | systematic review database search                                                                                                  | Older adults aged $\geq 60$ years                                                     | n.a.                | vaccine uptake          |
| 44 | Thomas (2018)    | n.a.                  | systematic review of RCTs database search                                                                                          | People in the community of high-income countries aged $\geq 60$ years<br>n= 1.055.337 | n.a.                | vaccination uptake (OR) |

**Supplementary Table 1.** Supplementary Table 1 shows study characteristics of 44 studies included into final evaluation of the scope review. As may be seen from the figure data on vaccination uptake were collected in countries on five continents (graphically structured by colour) and within care settings ranging from community to hospital and long-term care. Besides adults, also health and social care workforce were asked about vaccination uptake of influenza vaccination using face to face interviews, questionnaires and surveys, telephone interviews. Analysis from data basis such as the Medicare system were also taken into account. Overall, information was collected from 19.604.711 participants in studies included in the final analysis for this scope review.
