# Supplementary material
Source: PubMed Central journal article supplement (PMC8302495)
Supplement: 40520_2021_1793_MOESM3_ESM.pdf [file 40520_2021_1793_MOESM3_ESM.pdf]

# The role of health determinants in the influenza vaccination uptake among older adults (65+): a scope review

Aging Clinical and Experimental Research

Regina Roller-Wirnsberger (Corresponding Author, Medical University of Graz, Department of Internal Medicine), Sonja Lindner, Lea Kolosovski, Elisabeth Platzer, Peter Dovjak, Holger Flick, Chariklia Tziraki and Maddalena Illario

**Supplementary Table 3: Determinants associated with increase or decrease of VU**

| Author     | VU increase (+) or decrease (-) | Determinants associated with increase or decrease, respectively                                                                                                                                                                                                                                                                           |
|------------|---------------------------------|-------------------------------------------------------------------------------------------------------------------------------------------------------------------------------------------------------------------------------------------------------------------------------------------------------------------------------------------|
| Byeon 2018 | + men                           | <ul style="list-style-type: none"> <li>• Having a spouse/being married</li> <li>• Former smoker/non-smoker</li> <li>• Walking activities</li> <li>• Health examination</li> <li>• Visit of public health centre</li> <li>• Hypertension, diabetes, cardiovascular diseases</li> </ul>                                                     |
|            | + women                         | <ul style="list-style-type: none"> <li>• Unemployment</li> <li>• Former smoker/non-smoker</li> <li>• Health examinations</li> <li>• Visit of public health centre</li> <li>• Hypertension, diabetes</li> </ul>                                                                                                                            |
|            | - men                           | <ul style="list-style-type: none"> <li>• Good subjective health status</li> </ul>                                                                                                                                                                                                                                                         |
|            | - women                         | <ul style="list-style-type: none"> <li>• Alcohol consumption</li> <li>• Good health status</li> </ul>                                                                                                                                                                                                                                     |
| Cha 2016   | +                               | <ul style="list-style-type: none"> <li>• Receiving regular health screenings</li> </ul>                                                                                                                                                                                                                                                   |
| Chang 2016 | +                               | <ul style="list-style-type: none"> <li>• Receiving vaccination in previous year</li> <li>• Frequent use of outpatient departments</li> <li>• Undergoing health examinations in previous year</li> </ul>                                                                                                                                   |
| Kwon 2016  | +                               | <ul style="list-style-type: none"> <li>• Recent history of health screening</li> <li>• Higher age (<math>\geq 70</math> and <math>\geq 75</math>)</li> <li>• Self-reported health status as unhealthy</li> </ul>                                                                                                                          |
|            | -                               | <ul style="list-style-type: none"> <li>• Smoking</li> <li>• Low physical activity</li> </ul>                                                                                                                                                                                                                                              |
| Leung 2017 | +                               | <ul style="list-style-type: none"> <li>• Face-to-face patient education and information material</li> </ul>                                                                                                                                                                                                                               |
| Mo 2015    | +                               | <ul style="list-style-type: none"> <li>• Female gender</li> <li>• Chronic diseases</li> <li>• Participation in community activities</li> <li>• Knowledge of the fact that vaccine is required every year</li> <li>• Lower perceived side effect</li> <li>• Lower IV price</li> <li>• Recommendations from healthcare providers</li> </ul> |
| Oh 2015    | +                               | <ul style="list-style-type: none"> <li>• Female gender</li> <li>• Increasing age</li> </ul>                                                                                                                                                                                                                                               |

|                       |   |                                                                                                                                                                                                                                                  |
|-----------------------|---|--------------------------------------------------------------------------------------------------------------------------------------------------------------------------------------------------------------------------------------------------|
|                       |   | <ul style="list-style-type: none"> <li>• Having health insurance</li> <li>• Having medical check-up</li> <li>• Co-morbidities</li> <li>• Worse self-related health</li> </ul>                                                                    |
| Wershof-Schwartz 2013 | - | <ul style="list-style-type: none"> <li>• Female gender</li> <li>• Rural residency</li> <li>• Low socio-economic status</li> <li>• Recent immigration</li> <li>• Being from/Having physician from former Soviet Union</li> </ul>                  |
| Yu 2014               | + | <ul style="list-style-type: none"> <li>• Perceived susceptibility</li> <li>• Female gender</li> <li>• Multimorbidity</li> <li>• Perceived disease severity</li> <li>• Perceived benefit from current vaccination</li> </ul>                      |
|                       | - | <ul style="list-style-type: none"> <li>• Post-vaccination discomfort</li> </ul>                                                                                                                                                                  |
| Dyda 2015             | + | <ul style="list-style-type: none"> <li>• Female gender</li> <li>• Higher Body-Mass-Index</li> <li>• Requiring assistance in daily tasks</li> <li>• Reporting chronic diseases</li> </ul>                                                         |
|                       | - | <ul style="list-style-type: none"> <li>• Smokers</li> <li>• Non-English speaking country of birth</li> </ul>                                                                                                                                     |
| Regan 2017            | + | <ul style="list-style-type: none"> <li>• Text Message Reminder</li> </ul>                                                                                                                                                                        |
| Aguilar 2012          | + | <ul style="list-style-type: none"> <li>• Major chronic conditions</li> <li>• High level of dependence</li> <li>• More visits to the General Practitioner (GP)</li> <li>• IV in the previous season</li> </ul>                                    |
|                       | - | <ul style="list-style-type: none"> <li>• Female gender</li> <li>• Age &lt; 80 or &gt; 94 years</li> <li>• Immigrant status</li> <li>• Previous hospitalization</li> </ul>                                                                        |
| Barbadoro 2016        | + | <ul style="list-style-type: none"> <li>• Role of local policy in favouring VU</li> </ul>                                                                                                                                                         |
|                       | - | <ul style="list-style-type: none"> <li>• Younger age (65 -79 years compared to ≥ 80 years)</li> <li>• Medium level education</li> <li>• Absence of chronic diseases</li> <li>• Smoking</li> <li>• No GP contact in the last 12 months</li> </ul> |
| Caille-Brillet 2014   | + | <ul style="list-style-type: none"> <li>• Getting vaccinated in previous 2 seasons</li> </ul>                                                                                                                                                     |
| Domínguez 2016        | + | <ul style="list-style-type: none"> <li>• 3 or more GP visits in the previous year</li> <li>• IV in any of the previous 3 seasons</li> <li>• 23-valent pneumococcal polysaccharide vaccination</li> </ul>                                         |

|                    |                                                     |                                                                                                                                                                                                                                                                                                             |
|--------------------|-----------------------------------------------------|-------------------------------------------------------------------------------------------------------------------------------------------------------------------------------------------------------------------------------------------------------------------------------------------------------------|
| Ganczak 2017       | +                                                   | <ul style="list-style-type: none"> <li>• Younger age (&lt; 70 years)</li> <li>• Living in urban area</li> <li>• Co-morbidities</li> <li>• Vaccinated family members</li> <li>• Being informed about vaccination</li> <li>• Willingness for vaccination next year</li> </ul>                                 |
| Giese 2016         | -                                                   | <ul style="list-style-type: none"> <li>• Regarded as not necessary</li> <li>• Not thinking about it</li> <li>• Consider themselves not at risk</li> </ul>                                                                                                                                                   |
|                    | <b>- Health care workers</b>                        | <ul style="list-style-type: none"> <li>• Regarded as not necessary</li> <li>• Rarely getting influenza disease</li> <li>• Consider themselves not at risk</li> </ul>                                                                                                                                        |
| Godoy 2015         | +                                                   | <ul style="list-style-type: none"> <li>• Physician has been vaccinated</li> </ul>                                                                                                                                                                                                                           |
|                    | <b>+ Physician</b>                                  | <ul style="list-style-type: none"> <li>• Worried about infecting patients</li> <li>• Believe in effectiveness</li> <li>• Concerned about getting influenza disease</li> </ul>                                                                                                                               |
| Hellfritzsich 2017 | +                                                   | <ul style="list-style-type: none"> <li>• Higher co-morbidity level</li> <li>• Less likely to never have smoked</li> <li>• Higher prevalence of physical activity</li> <li>• Higher prevalence of major physical limitations</li> <li>• Need for assistance with activities of daily living (ADL)</li> </ul> |
| Martínez-Baz 2012  | +                                                   | <ul style="list-style-type: none"> <li>• More physician visits per year</li> </ul>                                                                                                                                                                                                                          |
|                    | -                                                   | <ul style="list-style-type: none"> <li>• Female gender</li> <li>• Age (65-69 years or &gt; 95 years)</li> <li>• Hospitalized or diagnosed with any major chronic condition in previous year</li> <li>• Haematological cancer or dementia</li> </ul>                                                         |
| Poscia 2016        | +                                                   | <ul style="list-style-type: none"> <li>• Communication/Awareness campaigns: System of reminders, recalls, information</li> </ul>                                                                                                                                                                            |
| Shah 2012          | +                                                   | <ul style="list-style-type: none"> <li>• Care home patients with &amp; without dementia</li> <li>• Chronic diseases</li> </ul>                                                                                                                                                                              |
|                    | -                                                   | <ul style="list-style-type: none"> <li>• Community-dwelling patients with dementia</li> <li>• Area deprivation</li> </ul>                                                                                                                                                                                   |
| Spreckelsen 2018   | +                                                   | <ul style="list-style-type: none"> <li>• Vaccination status before nursing home admission</li> <li>• Region (East-Germany compared to West-Germany)</li> <li>• Number of co-morbidities</li> </ul>                                                                                                          |
| Verger 2015        | No associations found for age group $\geq 65$ years |                                                                                                                                                                                                                                                                                                             |
| Vukovic 2018       | -                                                   | <ul style="list-style-type: none"> <li>• Low deprivation index</li> </ul>                                                                                                                                                                                                                                   |
| Blank 2012         | +                                                   | <ul style="list-style-type: none"> <li>• Good monitoring systems for VU rates</li> </ul>                                                                                                                                                                                                                    |

|                |                                 |                                                                                                                                                                                                                                                                                     |
|----------------|---------------------------------|-------------------------------------------------------------------------------------------------------------------------------------------------------------------------------------------------------------------------------------------------------------------------------------|
|                |                                 | <ul style="list-style-type: none"> <li>• Sending personal letters offering free vaccination</li> <li>• Additional policy elements (e.g. awareness campaigns)</li> </ul>                                                                                                             |
| Banach 2012    | +                               | <ul style="list-style-type: none"> <li>• Dementia</li> </ul>                                                                                                                                                                                                                        |
|                | -                               | <ul style="list-style-type: none"> <li>• Female gender</li> <li>• Black race</li> <li>• Living alone</li> </ul>                                                                                                                                                                     |
| Black 2017     | +                               | <ul style="list-style-type: none"> <li>• Increasing age (<math>\geq 85</math> years compared to 75-84 years and 65-74 years)</li> <li>• Female gender</li> <li>• Chronic medical conditions associated with higher risk for influenza-related complications</li> </ul>              |
|                | -                               | <ul style="list-style-type: none"> <li>• Race/Ethnicity: Non-hispanic blacks and Hispanic</li> </ul>                                                                                                                                                                                |
| Farmanara 2018 | -                               | <ul style="list-style-type: none"> <li>• Younger age (65-70 years compared to <math>&gt; 70</math> years)</li> <li>• Lower education level</li> <li>• No chronic medical conditions</li> </ul>                                                                                      |
| Hurley 2018    | +                               | <ul style="list-style-type: none"> <li>• Receipt of any needed vaccine (tetanus, diphtheria, acellular pertussis or pneumococcal besides influenza)</li> <li>• Centralized reminder/recall system</li> </ul>                                                                        |
|                | -                               | <ul style="list-style-type: none"> <li>• Prior refusal</li> <li>• Male gender</li> <li>• Older age (<math>\geq 85</math> years)</li> </ul>                                                                                                                                          |
| Kaljee 2017    | Factors affecting VU in general | <ul style="list-style-type: none"> <li>• Healthcare access and utilization</li> <li>• Communication and information sources</li> <li>• Social networks</li> <li>• Disease experience, knowledge and perceptions</li> <li>• Vaccine experience, knowledge and perceptions</li> </ul> |
| Khan 2018      | +                               | <ul style="list-style-type: none"> <li>• Disability</li> </ul>                                                                                                                                                                                                                      |
|                | -                               | <ul style="list-style-type: none"> <li>• Race/Ethnicity: Non-hispanic blacks and Hispanic</li> </ul>                                                                                                                                                                                |
| Lu 2014        | -                               | <ul style="list-style-type: none"> <li>• Member of ethnic minority group</li> <li>• Lower education</li> <li>• Unemployment</li> <li>• Chronic conditions</li> <li>• Last routine check-up <math>&gt; 1</math> year ago</li> <li>• Absence of personal doctor</li> </ul>            |
| Lu 2018        | +                               | <ul style="list-style-type: none"> <li>• Doctors visit, receiving provider recommendation</li> </ul>                                                                                                                                                                                |
| McIntyre 2014  | +                               | <ul style="list-style-type: none"> <li>• Recommendation by, and trust in, health professionals</li> <li>• Believe in effectiveness</li> </ul>                                                                                                                                       |
|                | -                               | <ul style="list-style-type: none"> <li>• Fear of adverse reactions</li> </ul>                                                                                                                                                                                                       |

|                |                                 |                                                                                                                                                                                                                                                                                                                                                                                                                                                             |
|----------------|---------------------------------|-------------------------------------------------------------------------------------------------------------------------------------------------------------------------------------------------------------------------------------------------------------------------------------------------------------------------------------------------------------------------------------------------------------------------------------------------------------|
|                |                                 | <ul style="list-style-type: none"> <li>• Believe in resilience</li> </ul>                                                                                                                                                                                                                                                                                                                                                                                   |
| Pereira 2019   | +                               | <ul style="list-style-type: none"> <li>• High-dose vaccine if free of cost</li> </ul>                                                                                                                                                                                                                                                                                                                                                                       |
| Takayama 2012  | +                               | <ul style="list-style-type: none"> <li>• Higher age</li> <li>• Prior diagnoses of chronic conditions (except myocardial infarction and stroke)</li> </ul>                                                                                                                                                                                                                                                                                                   |
|                | -                               | <ul style="list-style-type: none"> <li>• Non-white race</li> <li>• Lower household income</li> <li>• Lacking health care coverage</li> <li>• Smokers</li> <li>• Physical inactivity</li> <li>• Reporting days of poor physical health in past month</li> </ul>                                                                                                                                                                                              |
| Wooten 2012    | +                               | <ul style="list-style-type: none"> <li>• Believe in effectiveness</li> <li>• Higher education</li> <li>• Doctor's visit during flu season</li> <li>• Believe in personal susceptibility</li> <li>• Little concern of side effects</li> </ul>                                                                                                                                                                                                                |
| Yokum 2018     | +                               | <ul style="list-style-type: none"> <li>• Receipt of single mailed letters</li> </ul>                                                                                                                                                                                                                                                                                                                                                                        |
| Francisco 2015 | +                               | <ul style="list-style-type: none"> <li>• Male gender</li> <li>• Slow gait speed</li> <li>• Social involvement</li> </ul>                                                                                                                                                                                                                                                                                                                                    |
|                | -                               | <ul style="list-style-type: none"> <li>• Higher level of education</li> </ul>                                                                                                                                                                                                                                                                                                                                                                               |
| Sato 2015      | +                               | <ul style="list-style-type: none"> <li>• Higher age (<math>\geq 80</math> years compared to 70-79 years)</li> </ul>                                                                                                                                                                                                                                                                                                                                         |
| Doherty 2016   | -                               | <ul style="list-style-type: none"> <li>• Negative attitudes and beliefs regarding vaccination</li> <li>• Failure of health care provider to recommend vaccination</li> <li>• Lack of knowledge of vaccine safety and effectiveness</li> <li>• Perceived susceptibility</li> <li>• Lack of awareness of national recommendations</li> </ul>                                                                                                                  |
| Kan 2018       | Factors affecting VU in general | <ul style="list-style-type: none"> <li>• Demographic factors <ul style="list-style-type: none"> <li>– Age</li> <li>– Sex</li> <li>– Living with others</li> </ul> </li> <li>• Health promotion factors <ul style="list-style-type: none"> <li>– Health status and self-perceived health status</li> <li>– Health habits and medical service use</li> </ul> </li> <li>• Knowledge/information and its sources</li> <li>• Health behaviour factors</li> </ul> |

|             |   |                                                                                                                                                                                                                                                                                                                                                                                                                                                                                                                                    |
|-------------|---|------------------------------------------------------------------------------------------------------------------------------------------------------------------------------------------------------------------------------------------------------------------------------------------------------------------------------------------------------------------------------------------------------------------------------------------------------------------------------------------------------------------------------------|
|             |   | <ul style="list-style-type: none"> <li>- Threat perception</li> <li>- Perceived barriers</li> <li>- Cues to action</li> <li>- Behavioural beliefs</li> <li>- Subjective norms</li> <li>- Past behaviour</li> </ul>                                                                                                                                                                                                                                                                                                                 |
| Thomas 2018 | + | <ul style="list-style-type: none"> <li>• Reminder/recall by letter plus leaflet or postcard</li> <li>• Patient outreach by retired teachers</li> <li>• Invitations by clinic receptionists</li> <li>• Patient education by nurses/pharmacists</li> <li>• Patient counselling by medical students</li> <li>• Patient vaccination by nurses</li> <li>• Multiple recall questionnaires</li> <li>• Payments to physician</li> <li>• Physician reminders</li> <li>• Posters in clinics</li> <li>• Chart reviews/benchmarking</li> </ul> |

**Supplementary Table 3.** Supplementary Table 3 illustrates the determinants associated with increase or decrease of VU for each article analysed, respectively. Green rows equipped with a plus sign indicate VU increase, red rows with a minus sign display determinants decreasing VU. Some studies did not clearly figure out results of VU increase or decrease but present factors affecting VU in general.
